# Supplementary material
Source: MDPI journal article supplement (https://www.mdpi.com/2073-4344/11/11/1370)
Supplement: s1 [file s1]

## Supporting Information

### Strong Pyro-Electro-Chemical Coupling of Elbaite/ H<sub>2</sub>O<sub>2</sub> System for Pyrocatalysis Dye Wastewater

Fei Chen <sup>1</sup>, Jiesen Guo <sup>1</sup>, Dezhong Meng <sup>1,2,\*</sup>, Yuetong Wu <sup>1</sup>, Ruijin Sun <sup>1</sup> and Changchun Zhao <sup>1,\*</sup>

<sup>1</sup> School of Science, China University of Geosciences (Beijing), Beijing 100083, China; 1428943595@qq.com (F.C.); 2019190022@cugb.edu.cn (J.G.); 494281506@qq.com (Y.W.); sunruijin@cugb.edu.cn (R.S.)

<sup>2</sup> Zhengzhou Institute, China University of Geosciences (Beijing), Zhengzhou 451283, China;

\* Correspondence: mdz604@163.com (D.M.); 2011010020@cugb.edu.cn (C.Z.); Tel.: +86-10-8232-1062

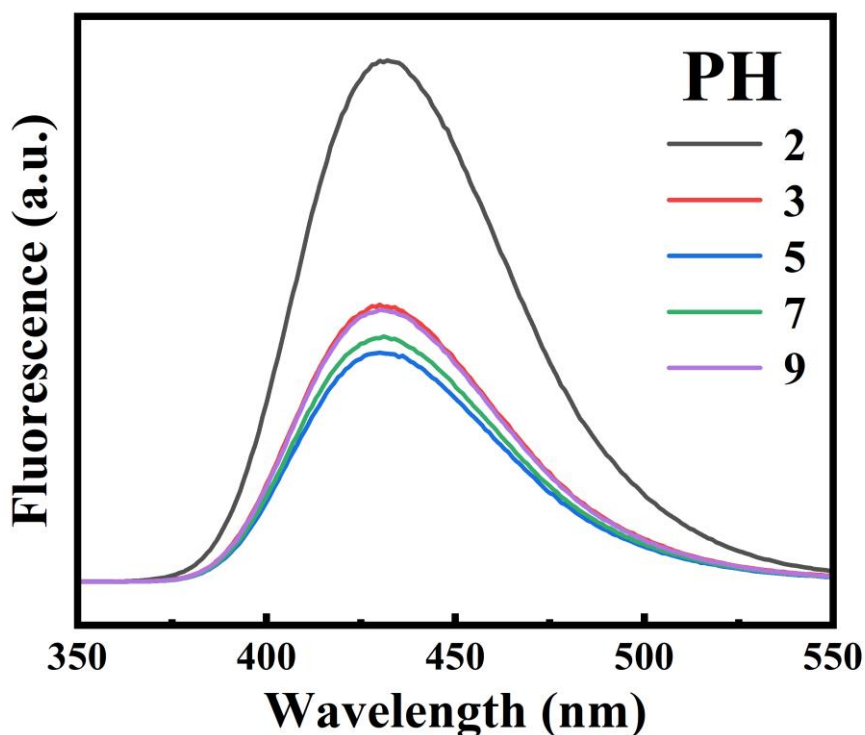

**Figure S1** The  $\cdot\text{OH}$  capture (TA) spectra of suspension at different pH.

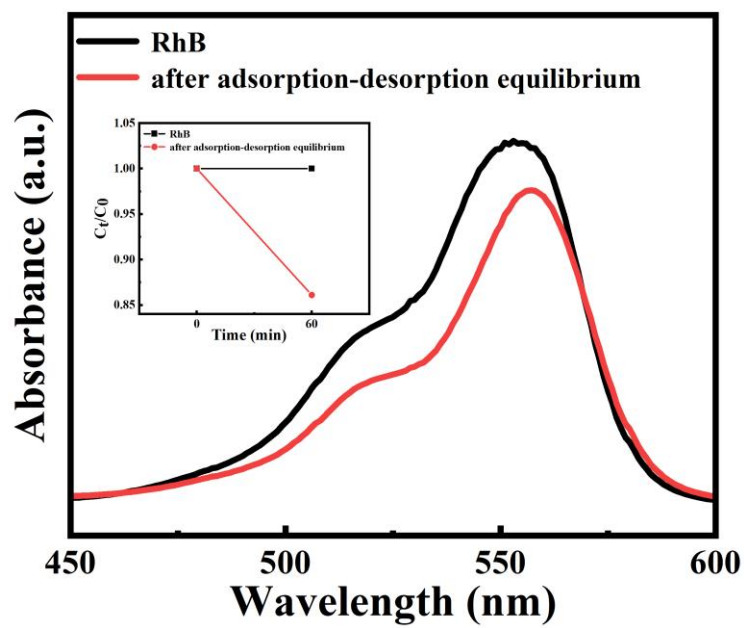

**Figure S2** Pyrocatalytic UV absorption spectrum of RhB after adsorption-desorption equilibrium.
